# Supplementary material
Source: PubMed Central journal article supplement (PMC5333673)
Supplement: NIHMS847118-supplement-Suplemental_Table.pdf [file NIHMS847118-supplement-Suplemental_Table.pdf]

Table S1 Primers for RT-PCR and PCR Cloning

|              | Forward (5'-3')             | Reverse (5'-3')                 |
|--------------|-----------------------------|---------------------------------|
| SalSCNAIV(1) | GCAAGGACATTTTCATGACAGAGGAGC | CATTTTCACCAAGAGGTTCTGCAC        |
| SalSCNAIV(2) | TGCTGGTCTGTCTCATCTTCTGGC    | AGACGAAGTTGATCCAGAAGAGAATTTCCG  |
| SalSCNAIV(3) | CGCCACATGCATTACAGCCAGC      | CGAACTTCCTCAGTATAATTAAGAGCCAAGC |
| SalSCNAIV(4) | GCATCCGACGAGGATGGCG         | AGGAAGTCAAGCCAGCACCAAGC         |
| SalSCNAIV(5) | TCCGTCTGTTGAGGGTCTTCAAGC    | GCAATAGGCACAAGCACAGTCAGG        |
| SalSCNAIV(6) | TCCACCCTGGTGGTACAAGTTTGC    | GATCCGCCAATGGCAATCTGC           |
| SalSCNAIV(7) | GCGTGCTGCTGGCAAGAC          | GCAACGATCTTGAAAACCATCTCAGCAGC   |
| SalSCNAIV(8) | CTCGCTGTCTTCGCACTTATTGGC    | CGTCATCTCCGCTGCTTCCAG           |
| SalSCNAIV(9) | GCTTGCTACCTTTTGGGTCTTTTCA   | CGGAAGAGTGAAAGAAAAGCCCAGTTG     |
| D4RT-RTPCR   |                             | AASVWNWCRAARTCDTCYTC            |
| GenY5C       | AAAGGNTGGATGGRNATHATGTA     |                                 |
| GenX5C       | TVYTBGTNTGYTIVATHHTTYTGG    |                                 |

Table S2- RACE Primers (forward)

|           |                                      |
|-----------|--------------------------------------|
| GSP-1(3') | 3'-AGGGTGATTAGGCTGGCGAGGATTGGGCGT-5' |
| GSP-2(3') | 3'-AGGCTGGCGAGGATTGGGCGTGTCTACGA-5'  |
| GSP-3(3') | 3'-GGTGATTAGGCTGGCGAGGATTGGGCGT-5'   |
| GSP-4(4') | 3'-AGGGTGATTAGGCTGGCGAGGATTGGGC-5'   |
| GSP-5(3') | 3'-AGGCTGGCGAGGATTGGGCGTGTCTAC-5'    |
