# Supplementary material
Source: PubMed Central journal article supplement (PMC5333673)
Supplement: NIHMS847118-supplement-Supplemental_Figure_2.pdf [file NIHMS847118-supplement-Supplemental_Figure_2.pdf]

|               |   |                                                               |
|---------------|---|---------------------------------------------------------------|
| Ambystoma     | 1 | ALKTITVIPGLKTIVGALIQSVKKLADVMILTVFCLAVFALIGLQFLFMGNLRQKCVRWPP |
| Salamandra    | 1 | ALKTITVIPGLKTIVGALIQSVKKLADVMILTVFCLAVFALIGLQFLFMGNLRQKCVRWPL |
| Pleurodeles   | 1 | ALKTITVIPGLKTIVGALIQSVKKLADVMILTVFCLAVFALIGLQFLFMGNLRQKCVRWPP |
| Tylototriton  | 1 | ALKTITVIPGLKTIVGALIQSVKKLADVMILTVFCLAVFALIGLQFLFMGNLRQKCVRWPP |
| Tar_torosa    | 1 | ALKTITVIPGLKTIVGALIQSVKKLADVMILTVFCLAVFALIGLQFLFMGNLRQKCVRWPL |
| Tar_granulosa | 1 | ALKTITVIPGLKTIVGALIQSVKKLADVMILTVFCLAVFALIGLQFLFMGNLRQKCVRWPL |
| Notophthalmus | 1 | ALKTITVIPGLKTIVGALIQSVKKLADVMILTVFCLAVFALIGLQFLFMGNLRQKCVRWPL |
| Cynops        | 1 | ALKTITVIPGLKTIVGALIQSVKKLADVMILTVFCLAVFALIGLQFLFMGNLRQKCVRWPP |
| Pachytriton   | 1 | ALKTITVIPGLKTIVGALIQSVKKLADVMILTVFCLAVFALIGLQFLFMGNLRQKCVRWPP |
| Triturus      | 1 | ALKTITVIPGLKTIVGALIQSVKKLADVMILTVFCLAVFALIGLQFLFMGNLRQKCVRWPS |

|               |    |                                                                |
|---------------|----|----------------------------------------------------------------|
| Ambystoma     | 61 | PNNMSEGE MFGFDNSTIFNTTMYNTEIINSTF---DWDEYIHNTDNFYFLDGALDALL    |
| Salamandra    | 61 | PNDTMVEDDLF GFDNGTSFNNTINDTMAMSNSTF---DWQ EYIHNTENFYFLEGALDALL |
| Pleurodeles   | 61 | PNDTIVDDYMLGFDNGTSFNNTVNNTMEMSNSTF---DWGEYIHNTENFYFQEGALDALL   |
| Tylototriton  | 61 | PNDTIVDDYMLGFDNGTSFNNTVNNTMAMSNSTF---DWGEYIHNTENFYFLDGALDALL   |
| Tar_torosa    | 61 | PNDTMVDDYMLGFDNGTSFNNTVNNTTAISNSTFDSFDWEEYIHNTDNFYFLDGARDALL   |
| Tar_granulosa | 61 | PNDTMVDDYMLGFDNGTSFNNTVNNTTAISNSTFDSFDWEEYIHNTDNFYFLDGARDALL   |
| Notophthalmus | 61 | PNDTMVDDYMLGFDNGTSFNNTVNSTTAISNSTF---DWEEYIHNTENFYFLDGARDALL   |
| Cynops        | 61 | PNDTMVDDYMLGFDNDT SFNNTVNDTTAISNSTF---DWKEYIHNTENFYFLEGALDALL  |
| Pachytriton   | 61 | PNDTMVDDYMLGFDNDT SFNNTVNDTTAISNSTF---DWKEYIHNTENFYFLEGALDALL  |
| Triturus      | 61 | PNDTMVDDYMFGLDNST SFNNTVNDTTAISNSTF---DWEEYIHNTENFYFLEGALDALL  |

|               |     |                                                              |
|---------------|-----|--------------------------------------------------------------|
| Ambystoma     | 118 | CGNSSDAGKCP EGYMCMKAGRPNPYGYTSSYDSFSWAFALFRLMTQDYWENLFQTLTAA |
| Salamandra    | 118 | CGNSSDAGKCP EGYVCMKAGRPNPYGYTHYDSFNWAFALFRLMTQDYWENLFQTLTAA  |
| Pleurodeles   | 118 | CGNSSDAGRCPEGYMCMKAGRPNPYGYTHYDSFNWAFALFRLMTQDYWENLFQTLTAA   |
| Tylototriton  | 118 | CGNSSDAGRCPEGYKCMKAGRPNPYGYTHYDSFNWAFALFRLMTQDYWENLFQTLTAA   |
| Tar_torosa    | 121 | CGNSSDAGRCPEGYVCMKAGRPNPYGYTHYDSFNWAFSLFRLMTQDYWENLFQTLTAA   |
| Tar_granulosa | 121 | CGNSSDAGRCPEGYVCMKAGRPNPYGYTHYDSFNWAFSLFRLMTQDYWENLFQTLTAA   |
| Notophthalmus | 118 | CGNSSDAGRCPEGYMCMKAGRPNPYGYTHYDSFNWAFALFRLMTQDYWENLFQTLTAA   |
| Cynops        | 118 | CGNSSDAGRCPEGYVCMKAGRPNPYGYTHYDSFNWAFALFRLMTQDYWENLFQTLTAA   |
| Pachytriton   | 118 | CGNSSDAGRCPEGYVCMKAGRPNPYGYTHYDSFNWAFALFRLMTQDYWENLFQTLTAA   |
| Triturus      | 118 | CGNSSDAGRCPEGYVCMKAGRPNPYGYTHYDSFNWAFALFRLMTQDYWENLFQTLTAA   |

|               |     |                                                             |
|---------------|-----|-------------------------------------------------------------|
| Ambystoma     | 178 | GKTYMIFVVIIFLGSFYLINLILAVVAMAYAEQNEATIQEALEKEEEFQKLLQLKKHQ  |
| Salamandra    | 178 | GKTYMIFVVIIFLGSFYLINLILAVVAMAYAEQNEATIQEALEKEEEFQMLLEQLKKHQ |
| Pleurodeles   | 178 | GKTYMIFVVIIFLGSFYLINLILAVVAMAYAEQNEATIQEALEKEEEFQKLLQLKKHQ  |
| Tylototriton  | 178 | GKTYMIFVVIIFLGSFYLINLILAVVAMAYAEQNEATIQEALEKEEEFQKLLQLKKHQ  |
| Tar_torosa    | 181 | GKTYMIFVVIIFLGSFYLINLILAVVAMAYADQNEATIQEALEKEEEFQKLLQLKKHQ  |
| Tar_granulosa | 181 | GKTYMIFVVIIFLGSFYLINLILAVVAMAYADQNEATIQEALEKEEEFQKLLQLKKHQ  |
| Notophthalmus | 178 | GKTYMIFVVIIFLGSFYLINLILAVVAMAYAEQNEATIQEALEKEEEFQKLLQLKKHQ  |
| Cynops        | 178 | GKTYMIFVVIIFLGSFYLINLILAVVAMAYAEQNEATIQEALEKEEEFQKLLQLKKHQ  |
| Pachytriton   | 178 | GKTYMIFVVIIFLGSFYLINLILAVVAMAYAEQNEATIQEALEKEEEFQKLLQLKKHQ  |
| Triturus      | 178 | GKTYMIFVVIIFLGSFYLINLILAVVAMAYAEQNEATIQEALEKEEEFQKLLQLKKHQ  |

|               |     |                                                                |
|---------------|-----|----------------------------------------------------------------|
| Ambystoma     | 238 | GEQQKLVMEQEKASQASLDL RNAENKT-SSGQDNGNSRDDDQQRKDCNGRIIPRVVIEGS  |
| Salamandra    | 238 | GEQQKV--EQEKASQASLDLINA EKKAAHSGQDTGSSADDDPERKDCNGRIIPKVVIDGS  |
| Pleurodeles   | 238 | GEQQKL--EQERASQASLDL RNAEKKTTTHSGQEPGSSGDE--EKNDCNGKIIPKVVIHGS |
| Tylototriton  | 238 | GEQQKL--EQEKASQASLDLINA EKKTTTHSGQDPGSSGDE--EKKDCNGKIIPKVVIHGS |
| Tar_torosa    | 241 | GEQQKL--EQEKASQASLDLINA EKKTTTHSGQDPGSSGDD--EKKDCNGRIIPKVVIDGS |
| Tar_granulosa | 241 | GEQQKL--EQEKASQASLDLINA EKKTTTHSGQDPGSSGDD--EKKDCNGRIIPKVVIDGS |
| Notophthalmus | 238 | GEQQKL--EQEKASQASLDLINA EKKTTTHS QDPGSSGDD--EKKDCNGRIIPKVVIDGS |
| Cynops        | 238 | GEQQKL--EQEKASKASLDLINA EKKSTQSGQDPGSSGDD--ERKDCNGRIIPKVVIDGS  |
| Pachytriton   | 238 | GEQHKL--EQEKASKASLDLINA EKKSTQSGQDPGSSGDD--ERKDCNGRIIPKVVIDGS  |
| Triturus      | 238 | GEQQKL--EQEKASKASLDLINA EKKSTQSGQDPGSSGDD--ERKDCNGRIIPKVMTDGS  |

Ambystoma 297 PKDEE P S P G N D H N K S D S K K S K D H L E E P A R Q T R S A S V I S V I S N A A M E A E L E E A Q Q K C P P W  
Salamandra 296 L N D E S S P A S D E K S P D S R K P S V D Y L A E P A R Q K R A A S V A S V I S N A A M E A E L E D A H K K C P P W  
Pleurodeles 294 P E D E S S P A N D Q N S T D G R K A S V D Y L A E P A R Q K R A A S V A S V I S N A A T E A E L E E A H K K C P P W  
Tylototriton 294 PKDEESSPANDQNSTDSRKASVDYLAEPARQKRAASVASVISNAAMEAELEEAHKKCPPW  
Tar\_torosa 297 PKDEESSPANDQHS TDSRKASVDYLAEPARQKRAASVASVMSNAAMEAELEDAHKKCPPW  
Tar\_granulosa 297 PKDEESSPANDQHS TDSRKASVDYLAEPARQKRAASVASVMSNAAMEAELEDAHKKCPPW  
Notophthalmus 294 PKDEESSPANDQCS TDSRKASVDYLAEPARQKRAASVASVISNAAMEAELEEAHQKCPPW  
Cynops 295 S N D E S S P A N D Q R S T D S R K A S V D Y L A E P A P L K R A A S V A S V M S N A A M E A E I E D A Q K T C P P W  
Pachytriton 295 S N D E S S P A N D Q R S T D S R K A S V D Y L A E P A P L K R A A S V A S V M S N A A M E A E I E D A Q K T C P P W  
Triturus 295 S R D E S S A A N E Q R S T D S R K A S V D Y L A E S A P Q K R S A S V A S V M S N A A M E A E L E D A Q K K C P S W  
Ambystoma 357 W Y K F A H K V L I W D C C A L Y V R F K G M V R F V M D P F V D L G I T I C I V L N T L F M A M E H Y P M T P Q F E  
Salamandra 355 W Y K F A H K F L I W D C C P Q Y V R F K G M V K F V M D P F V D L G I T I C I V L N T L F M A M E H Y P M T P Q F E  
Pleurodeles 354 W Y K F A N K A L I W D C C P I Y V R F K G M V R F V M D P F V D L G I T I C I V L N T L F M A M E H Y P M T P Q F E  
Tylototriton 354 W Y K F A H K A L I W D C Y P I Y V R F K G M V R F V M D P F V D L G I T I C I V L N T L F M A M E H Y P M T P Q F E  
Tar\_torosa 357 W Y K F A H K F L I W D C C P I Y V R F K G M V R F V M D P F V D L G I T I C I V L N T L F M A M E H Y P M T P Q F E  
Tar\_granulosa 357 W Y K V A H K F L I W D C C P I Y V R F K G M V R F V M D P F V D L G I T I C I V L N T L F M A M E H Y P M T P Q F E  
Notophthalmus 354 W Y K F A H K F L I W D C C P L Y V R F K G M V R F V M D P F V D L G I T I C I V L N T L F M A M E H Y P M T Q Q F E  
Cynops 355 W Y K F A H K F L I W D C C P M Y V R F K G M V R F V M D P F V D L G I T I C I V L N T L F M A M E H Y P M T P Q F E  
Pachytriton 355 W Y K F A H K F L I W D C C P M Y V R F K G K V R F V M D P F V D L G I T I C I V L N T L F M A M E H Y P M T P Q F E  
Triturus 355 W Y K F A H N I L I W D C C P M Y V R F K G M V R F V M D P F V D L G I T I C I V L N T L F M A M E H Y P M T P Q F E

Ambystoma 417 H V L N V G N L V F T G I F A A E M V F K I I A L D P Y Y F Q T G W N I F D S I I V T L S L V E L G L A N V Q G L S V  
Salamandra 415 H V L N V G N L V F T G I F A A E M V F K I I G L D P Y Y F Q T G W N I F D S I I V T L S L V E L G L A N V Q G L S V  
Pleurodeles 414 H V L N V G N L V F T G I F A A E M V F K I I A L D P Y Y F Q T G W N I F D S I I V T L S L V E L G L A N V Q G L S V  
Tylototriton 414 H V L N V G N L V F T G I F A A E M V F K I I A L D P Y Y F Q T G W N I F D S I I V T L S L V E L G L A N V Q G L S V  
Tar\_torosa 417 H V L N V G N L V F T G I F A A E M V F K I I A L D P Y Y F Q T G W N I F D S I I V T L S L V E L G L A N V Q G L S V  
Tar\_granulosa 417 H V L N V G N L V F T G I F A A E M V F K I I A L D P Y Y F Q T G W N I F D S I I V T L S L V E L G L A N V Q G L S V  
Notophthalmus 414 H V L N V G N L V F T G I F A A E M V F K I I A L D P Y Y F Q T G W N I F D S I I V T L S L V E L G L A N V Q G L S V  
Cynops 415 H V L N V G N L V F T G I F A A E M V F K I I A L D P Y Y F Q T G W N I F D S I I V T L S L V E L G L A N V Q G L S V  
Pachytriton 415 H V L N V G N L V F T G I F A A E M V F K I I A L D P Y Y F Q T G W N I F D S I I V T L S L V E L G L A N V Q G L S V  
Triturus 415 H V L N V G N L V F T G I F A A E M V F K I I A L D P Y Y F Q T G W N I F D S I I V T L S L V E L G L A N V Q G L S V

Ambystoma 477 L R S F R L L R V F K L A K S W P T L N M L I K I I G N S V G A L G N L T L V L A I I V F I F A V V G M Q L F G K S Y K  
Salamandra 475 L R S F R L L R V F K L A K S W P T L N M L I K I I G N S V G A L G N L T L V L A I I V F I F A V V G M Q L F G K S Y K  
Pleurodeles 474 L R S F R L L R V F K L A K S W P T L N M L I K I I G N S V G A L G N L T L V L A I I V F I F A V V G M Q L F G K S Y K  
Tylototriton 474 L R S F R L L R V F K L A K S W P T L N M L I K I I G N S V G A L G N L T L V L A I I V F I F A V V G M Q L F G K S Y K  
Tar\_torosa 477 L R S F R L L R V F K L A K S W P T L N M L I K I I G N S V G A L G N L T L V L A I I V F I F A V V G M Q L F G K S Y K  
Tar\_granulosa 477 L R S F R L L R V F K L A K S W P T L N M L I K I I G N S V G A L G N L T L V L A I I V F I F A V V G M Q L F G K S Y K  
Notophthalmus 474 L R S F R L L R V F K L A K S W P T L N M L I K I I G N S V G A L G N L T L V L A I I V F I F A V V G M Q L F G K N Y K  
Cynops 475 L R S F R L L R V F K L A K S W P T L N M L I K I I G N S V G A L G N L T L V L A I I V F I F A V V G M Q L F G K S Y K  
Pachytriton 475 L R S F R L L R V F K L A K S W P T L N M L I K I I G N S V G A L G N L T L V L A I I V F I F A V V G M Q L F G K S Y K  
Triturus 475 L R S F R L L R V F K L A K S W P T L N M L I K I I G N S V G A L G N L T L V L A I I V F I F A V V G M Q L F G K S Y K

Ambystoma 537 E C V C K I N Q D C V L P R W H M H D F F H S F L I V F R I L C G E W I E T M W D C M E V A G Q L C L T V F M M V M V  
Salamandra 535 D C V C K I N Q D C V M P R W H M T D F F H S F L I V F R I L C G E W I E T M W D C M E V A G Q G L C L T V F L M V M V  
Pleurodeles 534 D C V C K I S Q D C E M P R W H M T D F F H S F L I V F R I L C G E W I E T M W D C M E V A G Q G L C L T V F M M V M V  
Tylototriton 534 D C V C K I S Q D C E M P R W H M T D F F H S F L I V F R I L C G E W I E T M W D C M E V A G Q G L C L T V F M M V M V  
Tar\_torosa 537 D C V C K I N E D C E L P R W H M T D F F H S F L I V F R I L C G E W I E T M W D C M E V A G Q G L C L T V F M M V M V  
Tar\_granulosa 537 D C V C K I N E D C E L P R W H M T D F F H S F L I V F R I L C G E W I E T M W D C M E V A G Q G L C L T V F M M V M V  
Notophthalmus 534 D C V C K I N E D C E L P R W H M S D F F H S F L I V F R I L C G E Y I E T M W D C M E V A G Q G L C L T V F M M V M V  
Cynops 535 D C V C K I S E D C E L P R W H M T D F F H S F L I V F R I L C G E W I E T M W D C M E V A G Q G L C L T V F M M V M V  
Pachytriton 535 D C V C K I N E D C V L P R W H M T D F F H S F L I V F R I L C G E W I E T M W D C M E V A G Q G L C L T V F M M V M V  
Triturus 535 D C V C K I S E D C E L P R W H M T D F F H S F L I V F R I L C G E W I E T M W D C M E V A G Q G L C L T V F M M V M V

Ambystoma 597 IGNLVVLNLF LALLSSFSADNLSASDEDEGMNNLQIAIGRITRGVDFVKKTVYKIFRRK  
Salamandra 595 IGNLVVLNLF LALLSSFSADNLSASDEDEGMNNLQIAIGRITRAIDFVKKTVLKIIFRRK  
Pleurodeles 594 IGNLVVLNLF LALLSSFSADNLSASDEDEGMNNLQIAIGRITRGVDFVKKTVLKIIFGRK  
Tylototriton 594 IGNLVVLNLF LALLSSFSADNLSASDEDEGMNNLQIAIGRITRGVDFVKKTVLKIIFRRK  
Tar\_torosa 597 IGNLVVLNLF LALLSSFSADNLSASDEDEGMNNLQIAIGRITRGVDFVKKTVLKVFGKK  
Tar\_granulosa 597 IGNLVVLNLF LALLSSFSADNLSASDEDEGTENNLQIAIGRITRGVDFVKKTVLKVFGKK  
Notopthalmus 594 IGNLVVLNLF LALLSSFSADNLSASDEDEGMNNLQIAIGRITRGVDFVKKTVLKIIFRRK  
Cynops 595 IGNLVVLNLF LALLSSFSADNLSASDEDEGMNNLQIAIGRITRGVDFVKKTVLKIIFGKK  
Pachytriton 595 IGNLVVLNLF LALLSSFSADNLSASDEDEGMNNLQIAIGRITRGVDFVKKTVLKIIFGKK  
Triturus 595 IGNLVVLNLF LALLSSFSADNLSASDEDEGMNNLQIAIGRITRGFDVFKKTVLKIIFGKK

Ambystoma 657 PKQDDNMMKKNYVQNHVDTGQDSKSEFNFVDGVLAKAQFLMDEL DHTSNFIHNPNTVL  
Salamandra 655 AKEDDDMMKKNFVQNHVDTGQDSKSDNFNFVDGVLIAKEQFLMDEL DHTSNFIHNPNTVL  
Pleurodeles 654 AKEDEDMKKNFVQNHVDTGQDSKSDNFNFVDGVLTKAQFLMDEL DHTSNFIHNPNTVL  
Tylototriton 654 AKEDEDMKKNFVQNHVDTGQESKSDNFNFVDGVLTKAQFLMDEL DHTSNFIHNPNTVL  
Tar\_torosa 657 AKEDEDMKKNFVQNHVDTGQDSKSDNFNFVDGVSSTKEQFLMDEL DHTSNFIHNPNTVL  
Tar\_granulosa 657 AKEDEDMKKNFVQNHVDTGQDSKSDNFNFVDGVSSTKEQFLMDEL DHTSNFIHNPNTVL  
Notopthalmus 654 AKEDEDMKKNFVQNHVDTGQDSKSDNFNFVDGVLTKAQFLMDEL DHTSNFIHNPNTVL  
Cynops 655 AKEDEDMKKNFVQNHVDTGQDSKSDNFNFVDGVFTKEQFLMDEL DHTSNFIHNPNTV  
Pachytriton 655 AKEDEDMKKNFVQNHVDTGQDSKSDNFNFVDGVFTKEQFLMDEL DHTSNFIHNPNTV  
Triturus 655 AKEDEEMKKNFVQNHVDTGQDSKSDNFNFVDGVFTKEQFLMDQLDHTSNFIHNPNTV

Ambystoma 717 VPIASEESDLENPDEDETSILSGTDDSKDTRVGMNATCMQPTQAKKQINDGDSSIASTAN  
Salamandra 715 VPIASEESDLETPYEDETSILSGTDESKDTRVGMNATCTQPAQAKKKIHDGDSSIASTAD  
Pleurodeles 713 VPIASEESDLETPYEDETSLSSETESKDTRVGMNATCTQPTQAKKKIHDGDSSIASTAD  
Tylototriton 713 VPIASEESDLETPYEDETSLSSETDESKDTRVGMNATCTQPTQAKKKIHDGDSSIASTAD  
Tar\_torosa 716 VPIASEESDLETPYEDETSLSGTDESKDTRVGMNATCTIQPAQAKKKIHDGDSSIASTAD  
Tar\_granulosa 716 VPIASEESDLETPYEDETSLSGTDESKDTRVGMNATCTIQPAQAKKKIHDGDSSIASTAD  
Notopthalmus 713 VPIASEESDLETPYEDETSLSGTDESKDTRVGMNATCAQPAQAKKKIHDGDSSIASTAD  
Cynops 714 VPIASEESDLETPYEDETSLSGTDDSKDTRVGMNATCTQLAQAKKKIHDGDSSIASTAD  
Pachytriton 714 VPIASEESDLETPYEDEASSLSGTDDSKDTRVGMNATCTQLAQAKKKIHDGDSSIASTAD  
Triturus 714 VPIASEESDLETPYEDEASSLSGTDESKDTRVGMNATCTQPAQAKKKIRDGDSSIASTAD

Ambystoma 777 YKPPVEEEEDAAEHKEEGPEECFTEDCVRRCPFLYVDITQEKGRWNNLRKTCFKTIVE  
Salamandra 775 YKPPVKEETEDAAEHPEEGPEECFTEDCVRRCPMLYVDITQEKGIWNNIRKMKCFKIVE  
Pleurodeles 773 YKPPVEEEKDDAEHQEEGPEECFTEDCVRRCPVLYVDITQEKGIWNNIRNMCQIVE  
Tylototriton 773 YKPPVEEDKDDAEHQEEGPEECFTGDCVRRCPVLYVDITQEKGIWNNIRKMKCFKIVE  
Tar\_torosa 776 YKPPVEEEALDAAEHQEEAGPEECFTENCVRRCPILYVDITQERGIWNNLRKTCFKIVE  
Tar\_granulosa 776 YKPPVEEEALDAAEHQEEAGPEECFTENCVRRCPILYVDITQERGIWNNLRKTCFKIVE  
Notopthalmus 773 YKPPVEEEKLDAAEHQEEGPEECFTENCVHRCPILYVDITQERGKTWNNIRKTCFKIVE  
Cynops 774 YKAPVEEEEDAAEHQAEAGPEECFTENCVRRCPILYVDITQERGIWNNIRKTCFKIVE  
Pachytriton 774 YKAPVEEEEDAAEHQAEAGPEECFTEDCIRRCPILYVDITQERGIWNNIRKTCFKIVE  
Triturus 774 YKPHVEEEEDVDSAEHQAEAGPEECFTENCVRRCPNLYVDITQEKGRWNNLRKTCFKIVE

Ambystoma 837 HNWFEFIIIFMILLSSGALAFEDIYIEQRQVIKTILEYADKVFTYVFVIEMLLKWTAYGF  
Salamandra 835 HNWFEFIIIFMILLSSGALAFEDIYIEQRQVIKTILEYADKVFTYVFVIEMLLKWTAYGF  
Pleurodeles 833 HNWFEFIIIFMILLSSGALAFEDIYIEQRQVIKTILEYADKVFTYVFVIEMLLKWTAYGF  
Tylototriton 833 HNWFEFIIIFMILLSSGALAFEDIYIEQRQVIKTILEYADKVFTYVFVIEMLLKWTAYGF  
Tar\_torosa 836 HNWFEFIIIFMILLSSGALAFEDVYIEQRQVIKTILEYADKVFTYVFVIEMLLKWTAYGF  
Tar\_granulosa 836 HNWFEFIIIFMILLSSGALAFEDVYIEQRQVIKTILEYADKVFTYVFVIEMLLKWTAYGF  
Notopthalmus 833 HNWFEFIIIFMILLSSGALAFEDIYIEQRQVIKTILEYADKVFTYVFVIEMLLKWTAYGF  
Cynops 834 HNWFEFIIIFMILLSSGALAFEDIYIEQRQVIKTILEYADKVFTYVFVIEMLLKWTAYGF  
Pachytriton 834 HNWFEFIIIFMILLSSGALAFEDIYIEQRQVIKTILEYADKVFTYVFVIEMLLKWTAYGF  
Triturus 834 HNWFEFIIIFMILLSSGALAFEDVYIEQRQVIKTILEYADKVFTYVFVIEMLLKWTAYGF

Ambystoma 897 KIYFTNAWCWLDFLIVDVSLISLTANWLGYSSELGPIKSLRTLRLRPLRALS RFEGMRVV  
Salamandra 895 KIYFTNAWCWLDFLIVDVSLISLTANWLGYSSELGPIKSLRTLRLRPLRALS RFEGMRVV  
Pleurodeles 893 KIYFTNAWCWLDFLIVDVSLISLTANWLGYSSELGPIKSLRTLRLRPLRALS RFEGMRVV  
Tylototriton 893 KIYFTNAWCWLDFLIVDVSLISLTANWLGYSSELGPIKSLRTLRLRPLRALS RFEGMRVV  
Tar\_torosa 896 KIYFTNAWCWLDFLIVDVSLISLTANWLGYSSELGPIKSLRTLRLRPLRALS RFEGMRVV  
Tar\_granulosa 896 KIYFTNAWCWLDFLIVDVSLISLTANWLGYSSELGPIKSLRTLRLRPLRALS RFEGMRVV  
Notopthalmus 893 KIYFTNAWCWLDFLIVDVSLISLTANWLGYSSELGPIKSLRTLRLRPLRALS RFEGMRVV  
Cynops 894 KIYFTNAWCWLDFLIVDVSLISLTANWLGYSSELGPIKSLRTLRLRPLRALS RFEGMRVV  
Pachytriton 894 KIYFTNAWCWLDFLIVDVSLISLTANWLGYSSELGPIKSLRTLRLRPLRALS RFEGMRVV  
Triturus 894 KIYFTNAWCWLDFLIVDVSLISLTANWLGYSSELGPIKSLRTLRLRPLRALS RFEGMRVV

Ambystoma 957 VNALLGAIP SIMNVLLVCLIFWLIFSIMGVNLFAGKFYRCINTTTSELFPIINVVNNISDC  
Salamandra 955 VNALLGAIP SIMNVLLVCLIFWLIFSIMGVNLFAGKFYRCINTTTSELFPIIDFVNNKSDC  
Pleurodeles 953 VNALLGAIP SIMNVLLVCLIFWLIFSIMGVNLFAGKFYKRCINTTTSELFPIINVVNNKSDC  
Tylototriton 953 VNALLGAIP SIMNVLLVCLIFWLIFSIMGVNLFAGKFYKRCINTTTSELFPIINVVNNKSDC  
Tar\_torosa 956 VNALLGAIP SIMNVLLVCLIFWLIFSIMGVNLFAGKFYKRCINTTTSELFPIIDVNNKSDC  
Tar\_granulosa 956 VNALLGAIP SIMNVLLVCLIFWLIFSIMGVNLFAGKFYKRCINTTTSELFPIIDVNNKSDC  
Notopthalmus 953 VNALLGAIP SIMNVLLVCLIFWLIFSIMGVNLFAGKFYKRCINTTTSELFPIKVVNNKSDC  
Cynops 954 VNALLGAIP SIMNVLLVCLIFWLIFSIMGVNLFAGKFYKRCINTTTSELFPIIDVNNKSDC  
Pachytriton 954 VNALLGAIP SIMNVLLVCLIFWLIFSIMGVNLFAGKFYKRCINTTTSELFPIIDVNNKSDC  
Triturus 954 VNALLGAIP SIMNVLLVCLIFWLIFSIMGVNLFAGKFYKRCINTTTSELFPIIDVNNKSDC

Ambystoma 1017 MA--LNEETEQRWVNVKVNFDNVGLGYLSLLQVATFKGWM DIMYAAVDSREQGEQPEYEI  
Salamandra 1015 MA--LNSSEEARVNVKVNFDNVGLGYLSLLQVATFKGWM DIMYAAVDSREQGEQPEYEI  
Pleurodeles 1013 LA--LNEETEVRWVNVKVNFDNVGLGYLSLLQVATFKGWM DIMYAAVDSREQGEQPEYEI  
Tylototriton 1013 LA--MNYTEEVWVNVKVNFDNVGLGYLSLLQVATFKGWM DIMYAAVDSREQGEQPEYEI  
Tar\_torosa 1016 LA--LNYTEEVWVNVKVNFDNVGLGYLSLLQVATFKGWD DIMYAAVDSREQGDQPVEYEI  
Tar\_granulosa 1016 LA--LNYTEEVWVNVKVNFDNVGLGYLSLLQVATFKGWD DIMYAAVDSREQGDQPVEYEI  
Notopthalmus 1013 LA--LNYTEEARVNVKVNFDNVGLGYLSLLQVATFKGWD DIMYAAVDSREQGEQPEYEI  
Cynops 1014 LALYLNYTEEARVNVKVNFDNVGLGYLSLLQVATFKGWD DIMYAAVDSREQGEQPVEYEI  
Pachytriton 1014 LDLYLNYTEEARVNVKVNFDNVGLGYLSLLQVATFKGWD DIMYAAVDSREQGEQPVEYEI  
Triturus 1014 LA--LNYTEEARVNVKVNFDNVGLGYLSLLQVATFKGWD DIMYAAVDSREQGEQPVEYEI

Ambystoma 1075 NLYMYLYFVIFIIFGAFFTLNLFIGVIIDNFNQKKKFGGKDI FMTEEQKKYYNAMKKLG  
Salamandra 1073 NLYMYLYFVIFIIFGAFFTLNLFIGVIIDNFNQKKKFGGKDI FMTEEQKKYYNAMKKLG  
Pleurodeles 1071 NLYMYLYFVIFIIFGAFFTLNLFIGVIIDNFNQKKKFGGKDI FMTEEQKKYYNAMKKLG  
Tylototriton 1071 NLYMYLYFVIFIIFGAFFTLNLFIGVIIDNFNQKKKFGGKDI FMTEEQKKYYNAMKKLG  
Tar\_torosa 1074 NLYMYLYFVIFIIFGAFFTLNLFIGVIIDNFNQKKKFGGKDI FMTEEQKKYYNAMKKLG  
Tar\_granulosa 1074 NLYMYLYFVIFIIFGAFFTLNLFIGVIIDNFNQKKKFGGKDI FMTEEQKKYYNAMKKLG  
Notopthalmus 1071 NLYMYLYFVIFIIFGAFFTLNLFIGVIIDNFNQKKKFGGKDI FMTEEQKKYYNAMKKLG  
Cynops 1074 NLYMYLYFVIFIIFGAFFTLNLFIGVIIDNFNQKKKFGGKDI FMTEEQKKYYNAMKKLG  
Pachytriton 1074 NLYMYLYFVIFIIFGAFFTLNLFIGVIIDNFNQKKKFGGKDI FMTEEQKKYYNAMKKLG  
Triturus 1072 NLYMYLYFVIFIIFGAFFTLNLFIGVIIDNFNQKKKFGGKDI FMTEEQKKYYNAMKKLG

Ambystoma 1135 SKKPQKPIPRPQNKLGVLVDFVTKQVFDIVIMVLI CLNMVTMMVETDDQSEQKIEILYW  
Salamandra 1133 SKKPQKPIPRPQNKLGVLVDFVTKQVFDIVIMVLI CLNMVTMMVETD NQSAQKIEILYW  
Pleurodeles 1131 SKKPQKPIPRPQNKLGVLVDFVTKQVFDIMIMVLI CLNMVTMMIETDDQSDQKIEILYW  
Tylototriton 1131 SKKPQKPIPRPQNKLGVLVDFVTKQVFDILIMVLI CLNMVTMMIETDDQSEQKIEILYW  
Tar\_torosa 1134 SKKPQKPIPRPQNKLGVLVDFVTKQVFDIMIMVLI CLNMVTMMIETDDQSEQKIEILFW  
Tar\_granulosa 1134 SKKPQKPIPRPQNKLGVLVDFVTKQVFDIMIMVLI CLNMVTMMIETDDQSEQKIEILFW  
Notopthalmus 1131 SKKPQKPIPRPQNKLGVLVDFVTKQVFDIMIMVLI CLNMVTMMIETDDQSEQKIEILFW  
Cynops 1134 SKKPQKPIPRPQNKLGVLVDFVTKQVFDIVIMVLI CLNMVTMMIETDDQSEQKIEILYW  
Pachytriton 1134 SKKPQKPIPRPQNKLGVLVDFVTKQVFDIVIMVLI CLNMVTMMIETDDQSEQKIEILYW  
Triturus 1132 SKKPQKPIPRPQNKLGVLVDFVTKQVFDIVIMVLI CLNMVTMMIETDDQSEQKIEILYW

|               |      |                                                               |
|---------------|------|---------------------------------------------------------------|
| Ambystoma     | 1195 | INLVFIIVFTGECLLKMFALRHYYFTIGWNIFDFVVLVLSIAGVVLSDIIEKYFVSPPEFF |
| Salamandra    | 1193 | INLVFIVIFTGECLLKMFALRHYYFTIGWNIFDFVVLVLSIAGVVLSDIIEKYFVSPTLF  |
| Pleurodeles   | 1191 | INLVFIVVFTGECLLKMFALRHYYFTIGWNIFDFVVLVLSIAGVVLSDIIEKYFVSPTLF  |
| Tylototriton  | 1191 | INLVFIVVFTGECLLKMFALRHYYFTIGWNIFDFVVLVLSIAGVVLSDIIEKYFVSPTLF  |
| Tar_torosa    | 1194 | INLVFIVVFSGECLLKMFALRHYYFTIGWNIFDFVVLVLSIAGIVLSDIIEKYFVSPTLF  |
| Tar_granulosa | 1194 | INLVFIVVFSGECLLKMFALRHYYFTIGWNIFDFVVLVLSIAGIVLSDIIEKYFVSPTLF  |
| Notopthalmus  | 1191 | INLVFIVVFSGECLLKMFALRHYYFTIGWNIFDFVVLVLSIAGIVLSDIIEKYFVSPTLF  |
| Cynops        | 1194 | INLVFIVVFTGECLLKMFALRHYYFTIGWNIFDFVVLVLSIAGIVLSDIIEKYFVSPTLF  |
| Pachytriton   | 1194 | INLVFIVVFTGECLLKMFALRHYYFTIGWNIFDFVVLVLSIAGIVLSDIIEKYFVSPTLF  |
| Triturus      | 1192 | INLVFIVVFTGECLLKMFALRHYYFTIGWNIFDFVVLVLSIAGIVLSDIIEKYFVSPTLF  |

|               |      |                                                              |
|---------------|------|--------------------------------------------------------------|
| Ambystoma     | 1255 | RVIRLARIGRVLRLIRGAKGIRTLFLALMMSLPALFNIGLLLFLVMFIYSIFGMSNFAYV |
| Salamandra    | 1253 | RVIRLARIGRVLRLIRGAKGIRTLFLALMMSLPALFNIGLLLFLVMFIYSIFGMSNFAYV |
| Pleurodeles   | 1251 | RVIRLARIGRVLRLIRGAKGIRTLFLALMMSLPALFNIGLLLFLVMFIYSIFGMSNFAYV |
| Tylototriton  | 1251 | RVIRLARIGRVLRLIRGAKGIRTLFLALMMSLPALFNIGLLLFLVMFIYSIFGMSNFAYV |
| Tar_torosa    | 1254 | RVIRLARIGRVLRLIRGAKGIRTLFLALMMSLPALFNIGLLLFLVMFIYSIFGMSNFAYV |
| Tar_granulosa | 1254 | RVIRLARIGRVLRLIRGAKGIRTLFLALMMSLPALFNIGLLLFLVMFIYSIFGMSNFAYV |
| Notopthalmus  | 1251 | RVIRLARIGRVLRLIRGAKGIRTLFLALMMSLPALFNIGLLLFLVMFIYSIFGMSNFAYV |
| Cynops        | 1254 | RVIRLARIGRVLRLIRGAKGIRTLFLALMMSLPALFNIGLLLFLVMFIYSIFGMSNFAYV |
| Pachytriton   | 1254 | RVIRLARIGRVLRLIRGAKGIRTLFLALMMSLPALFNIGLLLFLVMFIYSIFGMSNFAYV |
| Triturus      | 1252 | RVIRLARIGRVLRLIRGAKGIRTLFLALMMSLPALFNIGLLLFLVMFIYSIFGMSNFAYV |

|               |      |                                                                |
|---------------|------|----------------------------------------------------------------|
| Ambystoma     | 1315 | KKESGVDDIFNFETFGNSIICLFQITTSAGWDGLLNPIIMNSGPPDCDPNLVHAGTSVRGD  |
| Salamandra    | 1313 | KKEAGIDDIFNFETFGNSIICLFQITTSAGWDGLLNPIILNTGPPDCDPTAEHPGTFVRGD  |
| Pleurodeles   | 1311 | KKEGGIDDMFNFNFTFGSSIICLFQSTTSAGWDGLLSPILNTGPPDCDPTAEHPGTLVVRGD |
| Tylototriton  | 1311 | KKEGGIDDMFNFNFTFGSSIICLFQSTTSAGWDGLLSPILNTGPPDCDPTAEHPGTFVSGD  |
| Tar_torosa    | 1314 | KKEGGIDDMFNFNFTFGSSIICLFQSTTSAGWSDLLIPIIMNTGPPDCDPTTEHPGTFVSGD |
| Tar_granulosa | 1314 | KKEGGIDDMFNFNFTFGSSIICLFQSTTSAGWSDLLIPIIMNTGPPDCDPTTEHPGTFVSGD |
| Notopthalmus  | 1311 | KKEGGIDDMFNFNFTFGSSIICLFQSTTSAGWSDLLNPIIMNTGPPDCDPTIENPGTFVSGD |
| Cynops        | 1314 | KKESGIDDMFNFNFTFGSSIICLFQSTTSAGWSDLLNPIILNTGPPDCDPTAEHPGTFVSGD |
| Pachytriton   | 1314 | KKESGIDDMFNFNFTFGSSIICLFQSTTSAGWSDLLNPIILNTGPPDCDPTVEHPGTFVSGD |
| Triturus      | 1312 | KKEGGIDDMFNFNFTFGSSIICLFQSTTSAGWSDLLSPIMNTGPPDCDPTAEHPGTFVSGD  |

|               |      |                                          |
|---------------|------|------------------------------------------|
| Ambystoma     | 1375 | CGNPSMGICFFCSYIIISFLIVVNMYIAIILENFNVATEE |
| Salamandra    | 1373 | CGNPSMGICFFCSYIIISFLIVINMYIAIILENFNVATEE |
| Pleurodeles   | 1371 | CGNPSMGICFFCSYIIISFLIVVNMYIAIILENFNVATEE |
| Tylototriton  | 1371 | CGNPSMGICFFCSYIIISFLIVVNMYIAIILENFNVATEE |
| Tar_torosa    | 1374 | CGNPSMGICFFCSYIIVSFLIVVNMYIAIILENFNVATEE |
| Tar_granulosa | 1374 | CGNPSMGICFFCSYIIVSFLIVVNMYIAIILENFNVATEE |
| Notopthalmus  | 1371 | CGNPSMGICFFCSYIIISFLIVVNMYIAIILENFNVATEE |
| Cynops        | 1374 | CGNPSMGICFFCSYIIISFLIVVNMYIAIILENFNVATEE |
| Pachytriton   | 1374 | CGNPSMGICFFCSYIIISFLIVVNMYIAIILENFNVATEE |
| Triturus      | 1372 | CGNPSMGICFFCSYIIISFLIVVNMYIAIILENFNVATEE |
